# Supplementary material for: Abnormal Endothelial Gene Expression Associated With Early Coronary Atherosclerosis
Source: PubMed Central journal article supplement — J Am Heart Assoc. 2020 Jul 16;9(14):e016134. doi: 10.1161/JAHA.120.016134 (PMC7660702; doi:10.1161/jaha.120.016134), 2020-07-16
Supplement: JAH3-9-e016134-s001.pdf [file JAH3-9-e016134-s001.pdf]

# **SUPPLEMENTAL MATERIAL**

**Data S1.**

## **SUPPLEMENTAL METHODS**

### **BOEC culture**

The present study was enabled by our prior developmental, standardization, and validation studies performed in 2000-2003 and described elsewhere (text references 2-5). These involved BOEC cultures from >150 unique individuals, with gene expression surveyed on >80. At our period of peak activity, we successfully established BOEC cultures 2-3 times per week, with a success rate of ~90%. As developed by the Hebbel Lab (Univ of Minnesota) our method includes taking each of the following extraordinary precautions to avoid culture variation effects and to maximize reproducibility.

[a] Necessary supplies, reagents, microarray chips, culture medium ingredients are acquired in sufficient quantity prior to study onset so there is no risk that lot number of anything could change in mid-study.

[b] At venipuncture, the first few ml of peripheral venous blood is discarded.

[c] Blood is maintained at room temperature between venipuncture and culture by using special shipping boxes <sup>8</sup> that provide this protection.

[d] Although in the past we have successfully established BOEC cultures up to 8 hours after venipuncture, we make every effort to minimize the venipuncture-to-culture delay. In the present study the interval between blood attainment and starting culture set-up was <4 hours.

[e] Any single step of the overall process (i.e., culture set-up/maintenance, quality control assessments, RNA preparation, cell biology experiments) is always performed by the same trained and highly-experienced technician known to consistently achieve highly reproducible results. For example, for the present study the single BOEC culture technician was available around-the-clock daily for ~2 years.

[f] All cultures are set up in the same culture room, using the same culture hood, using the same temperature/humidity/gas-controlled incubator. For our studies, a culture room is dedicated to BOEC specifically, and only the designated BOEC culture technician has access.

[g] All cultures are passed to the same extent, a nominal million-fold expansion providing  $\sim 3 \times 10^7$  BOEC. They are always harvested 4 hours after the last change of culture medium and when at 85-90% confluence. This degree of expansion is solidly within what we previously found to be a “safe window” of expansion: deliberately acquired gene expression changes (from IL-1/TNF) have completely washed out; and the cells are several logs of expansion shy of developing instability of phenotype or gene expression.

[h] Quality Control: All cultures are subjected to rigorous quality control measures, with success indicated by: cobblestone morphology; positive for VE-cadherin and vWF and P1H12(CD146); negative for CD45 and CD14; single population of cells at level of light microscopy. In addition, all cultures are submitted for cytogenetics analysis (to enable later exclusion of data from any exhibiting culture-acquired cytogenetic abnormalities).

Our prior standardization and validation studies revealed that BOEC cultures passing this multi-parameter screen additionally: are negative for CD133; 100%

endothelial at level of FACS; positive for multiple endothelial antigens (flk1, PECAM-1, VCAM-1, ICAM-1, CD34, CD51, thrombomodulin); exhibit typical endothelial behaviors such as “in vitro angiogenesis”, acLDL uptake, VCAM-1 upregulation in response to TNF/IL-1. Also, gene expression profiling confirms endothelial lineage identity, and EM reveals Weibel Palade bodies.

### Antibodies Used

| <u>Antibody</u>  | <u>Source</u> | <u>catalog #</u> | <u>Working dilution<br/>or concentration</u> |
|------------------|---------------|------------------|----------------------------------------------|
| anti-vWF         | Sigma         | F3520            | 1 µg/ml                                      |
| anti-VE-cadherin | Santa Cruz    | sc-6458          | 1 µg/ml                                      |
| anti-CD146       | Hebbel lab    | P1H12            | 5 µg/ml                                      |
| anti-CD45        | Santa-Cruz    | sc-25590         | 1 µg/ml                                      |
| anti-CD14        | Santa Cruz    | sc-9150          | 1 µg/ml                                      |
| anti-HMGB1       | ABCAM         | ab190377         | 1:500 dilution                               |
| anti-LAMC1       | Sigma         | sab 4051727      | 1 µg/ml                                      |

### Code used for samir:

```
require(samr)
x = as.matrix(expressionDat)
y = c(rep(2,13),rep(1,6))
data=list(x=x,y=y, geneid=probe.id, genenames= gene.id, logged2=F)
samr.obj<-samr(data, resp.type="Two class unpaired", nperms=500)
delta.table <- samr.compute.delta.table(samr.obj)
delta=0.719
samr.plot(samr.obj,delta)
siggenes.table<-samr.compute.siggenes.table(samr.obj,delta, data, delta.table)
```

**Table S1. Coronary reactivity assessment summary.**

Definition(s) of abnormal coronary endothelial function:  
less than 50% increase in coronary blood flow (CBF) in response to highest dose acetylcholine  
and/or  
more than 20% reduction in coronary artery diameter (CAD) in response to highest-dose acetylcholine

| <u>subject</u> | <u>% change CBF<br/>in response to<br/>highest-dose<br/>acetylcholine</u> | <u>% CAD change<br/>in response to<br/>highest-dose<br/>acetylcholine</u> | <u>subject<br/>group<br/>assignment</u> |
|----------------|---------------------------------------------------------------------------|---------------------------------------------------------------------------|-----------------------------------------|
| A              | 52                                                                        | -15                                                                       | NL                                      |
| B              | 99                                                                        | -9                                                                        | NL                                      |
| C              | 133                                                                       | 0                                                                         | NL                                      |
| D              | 129                                                                       | 0                                                                         | NL                                      |
| E              | 555                                                                       | 49                                                                        | NL                                      |
| F              | 57                                                                        | -20                                                                       | NL                                      |
| G              | 63                                                                        | -30                                                                       | ABNL                                    |
| H              | 20                                                                        | -42                                                                       | ABNL                                    |
| I              | -24                                                                       | -28                                                                       | ABNL                                    |
| J              | 56                                                                        | -30                                                                       | ABNL                                    |
| K              | 48                                                                        | 7                                                                         | ABNL                                    |
| L              | 7                                                                         | -4                                                                        | ABNL                                    |
| M              | 31                                                                        | -21                                                                       | ABNL                                    |
| N              | 46                                                                        | -10                                                                       | ABNL                                    |
| O              | -10                                                                       | -26                                                                       | ABNL                                    |
| P              | -24                                                                       | -36                                                                       | ABNL                                    |
| Q              | 22                                                                        | -33                                                                       | ABNL                                    |
| R              | -57                                                                       | -35                                                                       | ABNL                                    |
| S              | -100                                                                      | -100                                                                      | ABNL                                    |

**Table S2. Differentially expressed transcripts at threshold of Welch P<0.001, listed in order of P value.**

| <u>PROBE SET</u> | <u>GENE</u> | FDR<br>(%) | <u>P</u>             | FOLD<br>(ABNL/NL) | <u>EXPANDED NAME</u>                             |
|------------------|-------------|------------|----------------------|-------------------|--------------------------------------------------|
| 209041_s_at      | UBE2G2      | ≤0.1       | 2.9x10 <sup>-6</sup> | 1.28              | ubiquitin conjugating enzyme E2G2                |
| 209181_s_at      | RABGGTB     | ≤0.1       | 8.5x10 <sup>-6</sup> | 1.27              | Rab geranylgeranyltransferase subunit beta       |
| 203622_s_at      | PNO1        | ≤0.1       | 1.3x10 <sup>-5</sup> | 1.42              | partner of NOB1 homolog                          |
| 202855_s_at      | SLC16A3     | ≤0.1       | 2.0x10 <sup>-5</sup> | 1.84              | solute carrier family 16 member 3                |
| 218447_at        | CMC2        | 6.75       | 3.2x10 <sup>-5</sup> | 1.35              | C-X9-C containing motif containing 2             |
| 220890_s_at      | DDX47       | 6.75       | 4.1x10 <sup>-5</sup> | 1.22              | DEAD box helicase 47                             |
| 208996_s_at      | POLR2C      | ≤0.1       | 4.3x10 <sup>-5</sup> | 1.34              | RNA polymerase II, subunit C                     |
| 214938_x_at      | HMGB1       | ≤0.1       | 5.7x10 <sup>-5</sup> | 1.40              | high mobility group box 1                        |
| 216149_at        | LRRC37BP1   | 6.75       | 5.7x10 <sup>-5</sup> | 1.13              | leucine rich repeat containing 37B pseudogene 1  |
| 212714_at        | LARP4       | ≤0.1       | 1.1x10 <sup>-4</sup> | 1.20              | La ribonucleoprotein domain family member 4      |
| 202564_x_at      | SNX15       | 8.64       | 1.1x10 <sup>-4</sup> | 0.86              | sorting nexin 15                                 |
| 213825_at        | OLIG2       | ≤0.1       | 1.3x10 <sup>-4</sup> | 1.11              | oligodendrocyte transcription factor 2           |
| 219082_at        | AMDHD2      | ≤0.1       | 1.3x10 <sup>-4</sup> | 0.82              | N-acetylglucosamine-6-phosphate deacetylase      |
| 200770_s_at      | LAMC1       | 8.64       | 1.5x10 <sup>-4</sup> | 0.71              | laminin subunit gamma 1                          |
| 212601_at        | ZZEF1       | >10        | 1.5x10 <sup>-4</sup> | 0.88              | zinc finger, ZZ type with EF hand domain         |
| 213826_s_at      | H3F3B       | >10        | 1.8x10 <sup>-4</sup> | 0.84              | H3 histone, family 3B                            |
| 44120_at         | ADCK2       | >10        | 2.1x10 <sup>-4</sup> | 0.91              | aarF domain containing kinase 2                  |
| 220016_at        | AHNAK       | 6.75       | 2.3x10 <sup>-4</sup> | 1.15              | AHNAK nucleoprotein                              |
| 203202_at        | KRR1        | >10        | 2.8x10 <sup>-4</sup> | 1.29              | KRR1, small subunit processome component homolog |
| 208765_s_at      | HNRNPR      | >10        | 3.5x10 <sup>-4</sup> | 1.18              | heterogeneous nuclear ribonucleoprotein R        |
| 207734_at        | LAX1        | >10        | 3.7x10 <sup>-4</sup> | 1.08              | lymphocyte transmembrane adaptor 1               |
| 211999_at        | H3F3B       | 6.75       | 3.7x10 <sup>-4</sup> | 1.24              | H3 histone family member 3B                      |
| 205822_s_at      | HMGCS1      | >10        | 4.0x10 <sup>-4</sup> | 1.48              | 3-hydroxy-3methylglutaryl-Coenzyme A synthase 1  |
| 217370_x_at      | FUS         | >10        | 4.2x10 <sup>-4</sup> | 1.29              | FUS RNA binding protein                          |
| 214150_x_at      | ATP6V0E     | 8.64       | 4.2x10 <sup>-4</sup> | 0.80              | ATPase H <sup>+</sup> transporting V0 subunit e1 |

|             |          |      |                      |      |                                                  |
|-------------|----------|------|----------------------|------|--------------------------------------------------|
| 221255_s_at | EMC6     | >10  | 4.4x10 <sup>-4</sup> | 1.21 | ER membrane protein complex subunit 6            |
| 217370_x_at | FUS      | >10  | 4.2x10 <sup>-4</sup> | 1.29 | RNA binding protein FUS                          |
| 222382_x_at | NUP205   | >10  | 5.1x10 <sup>-4</sup> | 1.16 | nuclear pore complex protein Nup205              |
| 201965_s_at | SETX     | >10  | 5.7x10 <sup>-4</sup> | 0.85 | senataxin                                        |
| 208672_s_at | SFRS3    | 6.75 | 5.7x10 <sup>-4</sup> | 1.30 | serine and arginine rich splicing factor 3       |
| 212394_at   | EMC1     | 6.75 | 6.1x10 <sup>-4</sup> | 1.13 | ER membrane protein complex subunit 1            |
| 219836_at   | ZBED2    | >10  | 6.2x10 <sup>-4</sup> | 1.14 | zinc finger, BED-type containing 2               |
| 202722_at   | HMGCL    | >10  | 6.7x10 <sup>-4</sup> | 0.86 | hydroxymethylglutaryl-CoA lyase mitochondrial    |
| 202856_s_at | SLC16A3  | 6.75 | 7.0x10 <sup>-4</sup> | 1.72 | solute carrier family 16 member 3                |
| 208990_s_at | HNRPH3   | >10  | 7.1x10 <sup>-4</sup> | 1.31 | heterogeneous nuclear ribonucleoprotein H3 (2H9) |
| 211933_s_at | HNRNPA3  | >10  | 7.2x10 <sup>-4</sup> | 1.21 | heterogeneous nuclear ribonucleoprotein A3       |
| 214409_at   | RFPL3S   | >10  | 7.3x10 <sup>-4</sup> | 1.19 | RFPL3 antisense [ncRNA]                          |
| 215558_at   | C6orf133 | >10  | 8.1x10 <sup>-4</sup> | 1.11 | chromosome 6 open reading frame 13315            |
| 204647_at   | HOMER3   | >10  | 8.2x10 <sup>-4</sup> | 0.74 | homer scaffold protein 3                         |
| 201574_at   | ETF1     | 6.75 | 8.2x10 <sup>-4</sup> | 1.22 | eukaryotic translation termination factor 1      |
| 214882_s_at | SFRS2    | >10  | 8.7x10 <sup>-4</sup> | 1.27 | splicing factor, arginine-serine rich 2          |
| 200700_s_at | KDELR2   | 6.75 | 8.7x10 <sup>-4</sup> | 1.17 | KDEL endoplasmic reticulum protein retention R2  |
| 201862_s_at | LRRFIP1  | 6.75 | 9.7x10 <sup>-4</sup> | 1.49 | LRR binding FLII interacting protein 1           |
| 210269_s_at |          | >10  | 9.9x10 <sup>-4</sup> | 0.85 | DNA segment on X & Y 155 expr. sequence          |

**Table S3. ABNLs vs NLs did not significantly differ in expression of 40 inflammation-response genes (for each gene, all transcripts are listed).**

| <u>Gene</u> | <u>Probest</u> | <u>Fold Difference</u><br><u>ABNL/NL)</u> | <u>P</u> |
|-------------|----------------|-------------------------------------------|----------|
| AGER        | 210081_at      | 1.00                                      | 0.987    |
|             | 217046_s_at    | 0.87                                      | 0.076    |
| CAT         | 215573_at      | 0.98                                      | 0.616    |
| C3          | 217767_at      | 0.90                                      | 0.077    |
|             | 211922_s_at    | 0.81                                      | 0.110    |
|             | 201432_at      | 0.83                                      | 0.044    |
| C4          | 214428_x_at    | 1.02                                      | 0.554    |
|             | 208451_s_at.   | 1.00                                      | 0.985    |
| C5          | 205500_at      | 1.04                                      | 0.600    |
| CCL2        | 216598_s_at    | 0.90                                      | 0.827    |
| CCL3        | 205114_s_at    | 1.00                                      | 0.974    |
| CRP         | 205753_at      | 0.99                                      | 0.885    |
|             | 37020_a        | 0.94                                      | 0.215    |
| F3          | 204363_at      | 1.00                                      | 0.971    |
| HMOX1       | 203665_at      | 1.01                                      | 0.978    |
| ICAM1       | 215485_s_at    | 0.87                                      | 0.305    |
|             | 202638_s_at    | 0.73                                      | 0.294    |
|             | 202637_s_at    | 0.84                                      | 0.371    |
| IFNB1       | 208173_at      | 0.97                                      | 0.631    |
| IL1 $\beta$ | 205067_at      | 1.00                                      | 0.936    |
|             | 39402_at       | 0.98                                      | 0.515    |
| IL2         | 207849_at      | 0.98                                      | 0.645    |
| IL6         | 205207_at      | 1.20                                      | 0.213    |
| IL8         | 202859_x_at    | 0.90                                      | 0.678    |
|             | 211506_s_at    | 0.68                                      | 0.412    |
| JUN         | 213281_at      | 1.00                                      | 0.981    |
|             | 201466_s_at    | 0.94                                      | 0.607    |
|             | 201465_s_at    | 0.92                                      | 0.281    |
|             | 201464_x_at    | 0.91                                      | 0.313    |
| MYC         | 202431_s_at    | 1.09                                      | 0.272    |
| NFKB1       | 209239_at      | 1.02                                      | 0.785    |
| NFKB2       | 209636_at      | 0.88                                      | 0.089    |
|             | 207535_s_at    | 0.84                                      | 0.309    |
|             | 211524_at      | 1.04                                      | 0.384    |
| NFKBIA      | 201502_s_at    | 0.86                                      | 0.267    |
| NOS1        | 207309_at      | 1.06                                      | 0.202    |
|             | 207310_s_at    | 0.98                                      | 0.576    |
| NOS3        | 205581_s_at    | 1.08                                      | 0.781    |
| PPARG       | 208510_s_at    | 0.74                                      | 0.154    |
| PTK2        | 207821_s_at    | 0.95                                      | 0.514    |
|             | 208820_at      | 0.92                                      | 0.241    |



|       |             |       |       |
|-------|-------------|-------|-------|
| REL   | 206036_s_at | 0.99  | 0.862 |
| RELA  | 201783_s_at | 1.01  | 0.717 |
|       | 209878_s_at | 1.01  | 0.901 |
| RELB  | 205205_at   | 0.88. | 0.236 |
| SELE  | 206211_at   | 0.65  | 0.357 |
| SEL   | 206049_at   | 0.91  | 0.617 |
| SP1   | 214732_at   | 1.04  | 0.434 |
| TGFβ  | 203084_at   | 0.94  | 0.230 |
|       | 203085_s_at | 0.96  | 0.750 |
| TLR2  | 204924_at   | 0.79  | 0.216 |
| TLR4  | 221060_s_at | 0.81  | 0.410 |
| TP53  | 211300_s_at | 1.06  | 0.660 |
|       | 201746_at   | 0.98  | 0.857 |
| TNF   | 207113_s_at | 1.01  | 0.770 |
| SOD1  | 200642_at   | 1.02  | 0.757 |
| SRC   | 221281_at   | 0.95  | 0.370 |
|       | 213324_at   | 0.97  | 0.668 |
|       | 221284_s_at | 0.92  | 0.225 |
| VCAM1 | 203868_s_at | 1.14  | 0.799 |
| VEGF  | 212171_x_at | 0.95  | 0.368 |
|       | 210513_s_at | 0.91  | 0.402 |
|       | 211527_x_at | 0.87  | 0.244 |
|       | 210512_s_at | 0.84  | 0.407 |
|       | 211527_x_at | 0.87  | 0.244 |
|       | 212171_x_at | 0.95  | 0.368 |

**Figure S1. Hierarchical clustering analyses. A.** Clustering using the universe of all 43 transcripts significant at  $P < 0.001$  suggests *HMGB1* is important but not the sole discriminator between NLs vs ABNLs. The low-*HMGB1* subjects in the ABNL group are outlined in the inset. **B.** Clustering using only the 9 transcripts significant at  $FDR < 0.1\%$  reveals substructure discriminating all lowest *HMGB1* expressers (those encircled in the inset) from the highest *HMGB1* expressers, regardless of subject group.

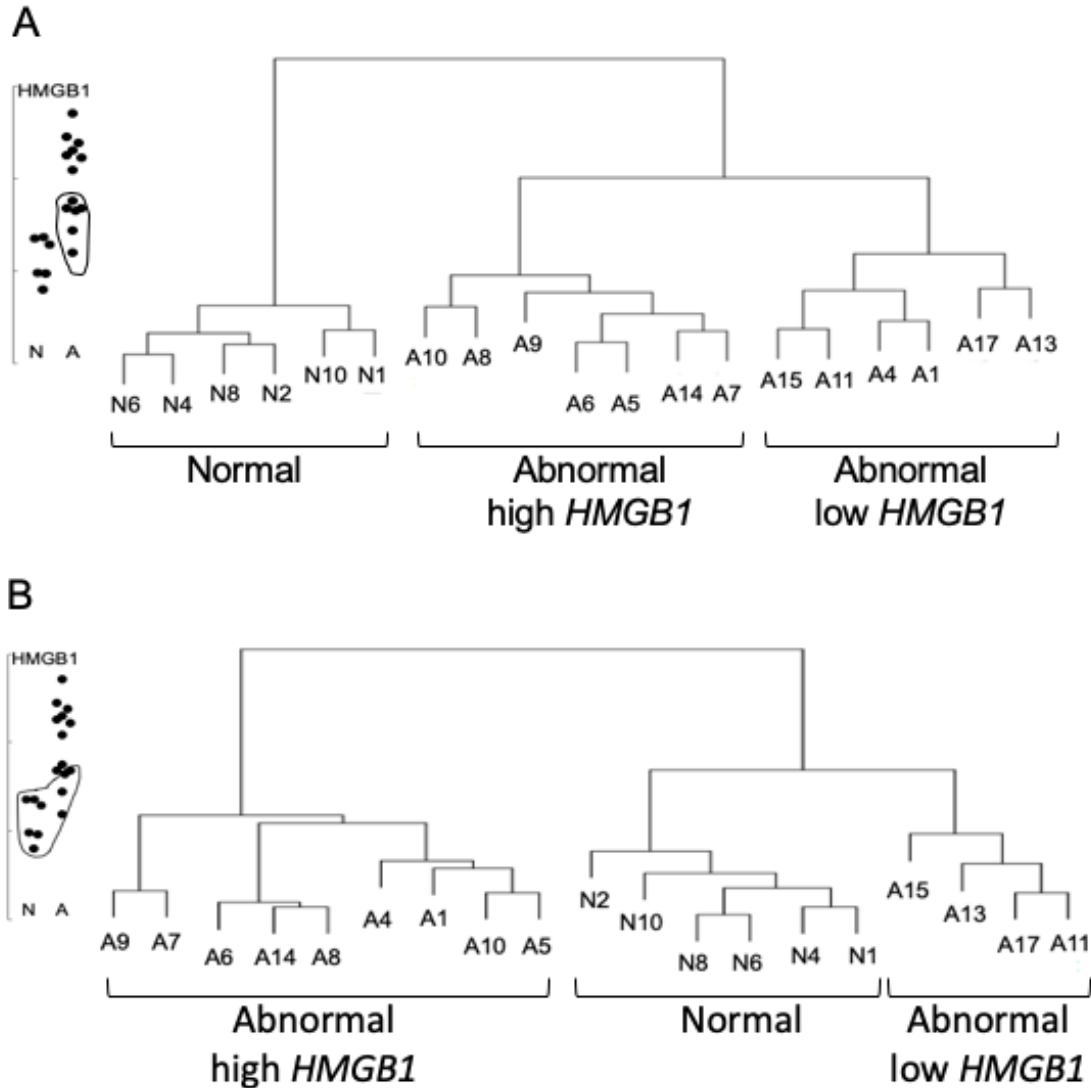

**Figure S2. Random forest analysis.**

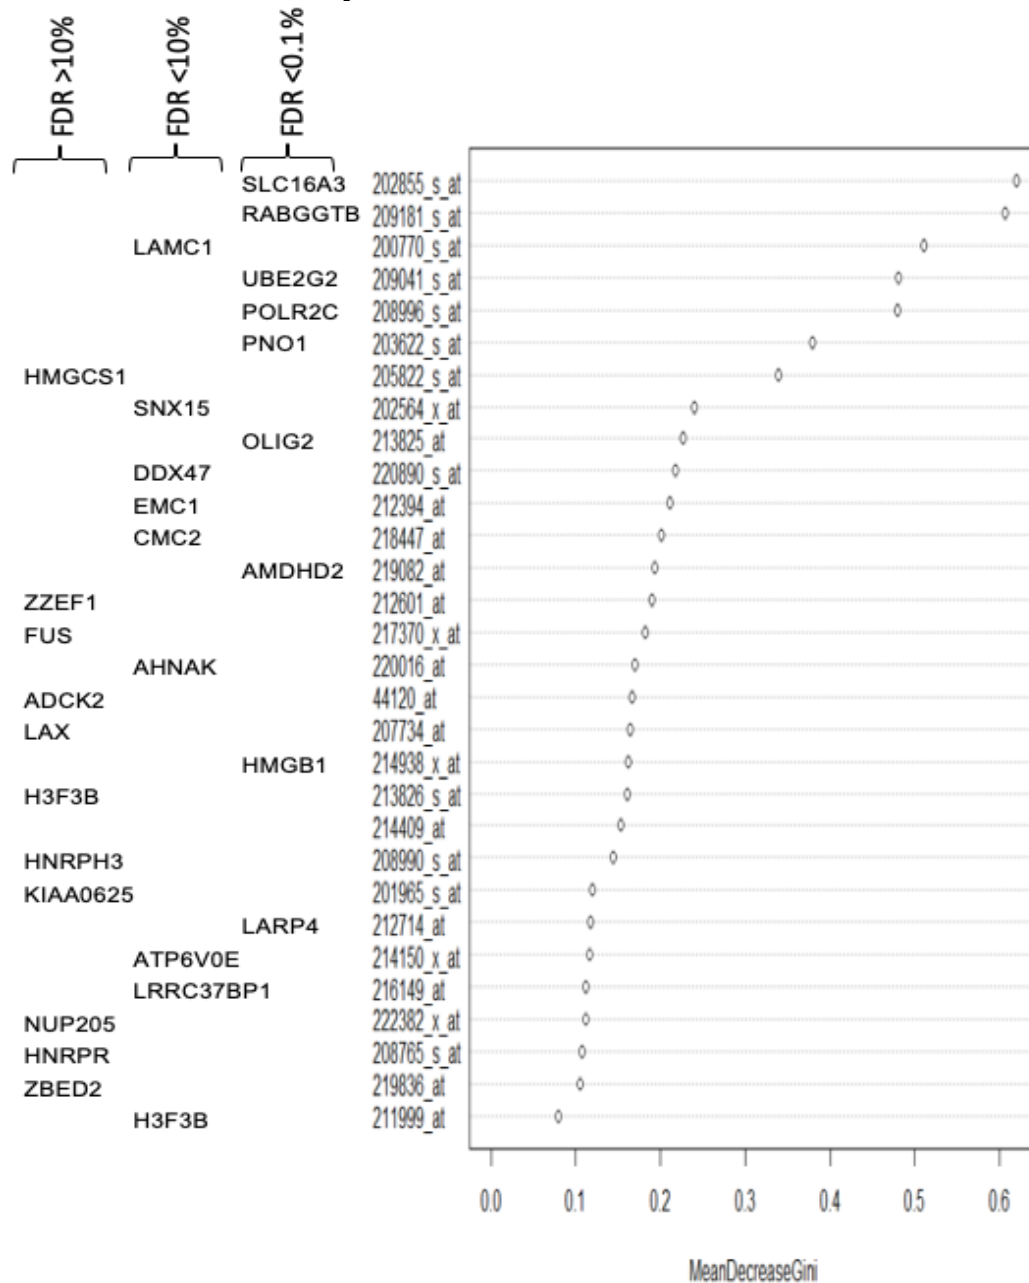

We applied a random forest approach (using the universe of 43 transcripts significant at  $P < 0.001$  that yielded the clustering pattern shown in Supplemental Figure 1A) to estimate relative degree of contribution made by individual transcripts/genes in correctly separating ABNLs from NLs. Stronger contribution is rightwards on the horizontal axis. At the left, transcripts are listed by gene names in one of three columns indicating their significance level:  $FDR > 10\%$  (far left),  $FDR < 10\%$  but  $> 0.1\%$  (middle),  $FDR < 0.1\%$  (right).
